# Supplementary material for: Integrated Sustainable Management of Petrochemical Industrial Air Pollution
Source: MDPI journal article supplement (doi:10.3390/ijerph20032280), 2023-01-27
Supplement: s1 [file s1]

## Supplementary Materials:

# Integrated sustainable management of petrochemical industrial air pollution

Jutarat Keawboonchu <sup>1,2</sup>, Sarawut Thepanondh <sup>1,2, \*</sup>, Vanitchaya Kultan <sup>1,2</sup>, Nattaporn Pinthong <sup>1,2</sup>, Wissawa Ma-lakan <sup>1,2</sup> and Mark Gregory Robson <sup>3</sup>

<sup>1</sup> Department of Sanitary Engineering, Faculty of Public Health, Mahidol University, Bangkok 10400 Thailand; jutarat.kboonchu@gmail.com (J.K.); sarawut.the@mahidol.ac.th (S.T.); vanitchayakultan@gmail.com (V.K.), nattasan62@gmail.com (N.P.), wissawamalakan@gmail.com (W.M.)

<sup>2</sup> Center of Excellence on Environmental Health and Toxicology (EHT), OPS, MHESI, Thailand

<sup>3</sup> School of Environmental and Biological Science, Department of Plant Biology, Rutgers, The State University of New Jersey, New Brunswick, New Jersey, USA

\* Correspondence: sarawut.the@mahidol.ac.th; Tel.; 0 2354 8540

**Table S1.** Air dispersion models.

| Modelling types | Model descriptions                                                                                                                                                                                                                                      | Advantage                                                                                                                                                                                                               | Limitation                                                                               |
|-----------------|---------------------------------------------------------------------------------------------------------------------------------------------------------------------------------------------------------------------------------------------------------|-------------------------------------------------------------------------------------------------------------------------------------------------------------------------------------------------------------------------|------------------------------------------------------------------------------------------|
| AERMOD [1-2]    | AERMOD model, a steady state plume model based on planetary boundary layer turbulence structure and scaling scheme, can be applied to surface and elevated sources as well as simple and complex topography with a prediction range of less than 50 km. | The model is widely used in various applications, including pollutant concentrations and applications for odor nuisance. The model can generate the concentration contributions of different sources of air pollutants. | The model requires external validation and resolves background concentrations.           |
| CALPUFF [3-4]   | CALPUFF model, an advance non steady state puff dispersion model, can process for multi-layer and multi-species of air pollutants to simulate the influences of spatiotemporal changes on the migration, transformation, and                            | The model can be used to simulate a medium- to large-scale rough and complex topographical domain, and its meteorological models include onshore and aquatic                                                            | The completely hourly meteorological data is considerably required to process the model. |

| Modelling types | Model descriptions                                                                                                                                                                                 | Advantage                                                                                                                                                         | Limitation                                                                                                                                                         |
|-----------------|----------------------------------------------------------------------------------------------------------------------------------------------------------------------------------------------------|-------------------------------------------------------------------------------------------------------------------------------------------------------------------|--------------------------------------------------------------------------------------------------------------------------------------------------------------------|
|                 | removal of pollutants with the recommended distance range above 50km.                                                                                                                              | boundary layer modules.                                                                                                                                           |                                                                                                                                                                    |
| HYSPLIT [5-6]   | HYSPLIT model is a computing air parcel trajectory and dispersion model using either puff or particle approaches. The model tracks the movement of particles and gases carried by air flow.        | The model can be used to compute and predict the regional influence for atmospheric vertical profile using forward and backward trajectory.                       | The application of multi-emission sources and the complicated emission rates are still limitation.                                                                 |
| CAMx [7]        | CAMx is the photochemical grid model used to simulate physical and chemical processes governing the formation and transport of ozone and particulate matter on multi-scales in cities and regions. | The model can simulate air quality on multiple geographic scales. The model can also be used for sensitivity, source contribution and process analysis.           | The uncertainty of emission inventories is susceptible to the source apportionment analysis. The application of The CAMx surface model still has some limitations. |
| CMAQ [8-9]      | CMAQ model, a multi-pollutant air quality modeling system, can simulate particulate matter, ozone, visibility, toxic airborne pollutants, and nutrient pollutant species overall the troposphere.  | The model can process in scenario of multi-dimensional information at the same time and makes the air quality simulation technology to be efficient and accurate. | The sophisticated computer software and hardware equipment is required. Many specific input data is required such as weather data from MM5 and WRF model.          |

**Table S2.** Equipment leak rate and screening value of synthetic organic chemical manufacturing industry (SOCMI)<sup>a</sup>.

| Equipment type        | Default zero emission rate (kg/hr./item) | Pegged emission rates (kg/hr./item) | Correlations <sup>b</sup> (kg/hr./item)     |
|-----------------------|------------------------------------------|-------------------------------------|---------------------------------------------|
| Gas/vapor valve       | 0.00000066                               | 0.11                                | $= 1.87 \times 10^{-6} \times (SV)^{0.873}$ |
| Light liquid valve    | 0.00000049                               | 0.15                                | $= 6.41 \times 10^{-6} \times (SV)^{0.797}$ |
| Pump                  | 0.00000075                               | 0.62                                | $= 1.90 \times 10^{-5} \times (SV)^{0.824}$ |
| Compressor            | 0.00000075                               | 0.62                                | $= 1.90 \times 10^{-5} \times (SV)^{0.824}$ |
| Pressure relief valve | 0.00000075                               | 0.62                                | $= 1.90 \times 10^{-5} \times (SV)^{0.824}$ |
| Agitators             | 0.00000075                               | 0.62                                | $= 1.90 \times 10^{-5} \times (SV)^{0.824}$ |
| Connector/flange      | 0.00000061                               | 0.22                                | $= 3.05 \times 10^{-6} \times (SV)^{0.885}$ |

Notes: kg/hr./source = kilograms TOC per hour per source.

a: Data reported in USEPA (1995). For closed sampling points, if the sampling bottle is connected to the sampling port, use the emission factor of the "connector"; if the sampling bottle is not connected to the sampling port, use the emission factor of the "open-ended line".

b: SV is the net screening value (SV, ppmv) measured by the monitoring device.

c: The light liquid pump factors can also be applied to compressors, pressure relief valves, agitators, and heavy liquid pumps.

**Table S3.** Saturation (S) factors for calculating petroleum liquid loading losses.

| Cargo carrier                         | Mode of operation                                  | S factor |
|---------------------------------------|----------------------------------------------------|----------|
| <b>Tank tracks and rail tank cars</b> | Submerged loading of a clean cargo tank            | 0.50     |
|                                       | Submerged loading: dedicated normal service        | 0.60     |
|                                       | Submerged loading: dedicated vapor balance service | 1.00     |
|                                       | Splash loading of a clean cargo tank               | 1.45     |
|                                       | Splash loading: dedicated normal service           | 1.45     |
|                                       | Splash loading: dedicated vapor balance service    | 1.00     |
|                                       |                                                    |          |
| <b>Marine vessels</b>                 | Submerged loading: ships                           | 0.2      |
|                                       | Submerged loading: barges                          | 0.5      |

**Table S4.** The predicted annual concentration of benzene.

| Scenario No.          | Receptor sites | Annual Concentration ( $\mu\text{g}/\text{m}^3$ ) |
|-----------------------|----------------|---------------------------------------------------|
| <b>Scenario No. 1</b> | MK             | 3.509                                             |
|                       | BB             | 1.482                                             |
|                       | NP             | 2.527                                             |
|                       | MN             | 2.051                                             |
|                       | HP             | 2.334                                             |
|                       | MY             | 2.137                                             |
|                       | BP             | 1.852                                             |
|                       | BG             | 12.745                                            |
| <b>Scenario No. 2</b> | MK             | 2.494                                             |
|                       | BB             | 1.184                                             |
|                       | NP             | 2.021                                             |
|                       | MN             | 1.532                                             |
|                       | HP             | 1.734                                             |
|                       | MY             | 1.663                                             |
|                       | BP             | 1.424                                             |
|                       | BG             | 8.298                                             |
| <b>Scenario No. 3</b> | MK             | 0.294                                             |
|                       | BB             | 0.244                                             |
|                       | NP             | 0.287                                             |
|                       | MN             | 0.132                                             |
|                       | HP             | 0.291                                             |
|                       | MY             | 0.368                                             |
|                       | BP             | 0.296                                             |
|                       | BG             | 0.770                                             |
| <b>Scenario No. 4</b> | MK             | 0.174                                             |
|                       | BB             | 0.187                                             |
|                       | NP             | 0.204                                             |
|                       | MN             | 0.064                                             |
|                       | HP             | 0.173                                             |
|                       | MY             | 0.278                                             |
|                       | BP             | 0.218                                             |
|                       | BG             | 0.459                                             |

| Scenario No.   | Receptor sites | Annual Concentration ( $\mu\text{g}/\text{m}^3$ ) |
|----------------|----------------|---------------------------------------------------|
| Scenario No. 5 | MK             | 0.117                                             |
|                | BB             | 0.166                                             |
|                | NP             | 0.183                                             |
|                | MN             | 0.043                                             |
|                | HP             | 0.129                                             |
|                | MY             | 0.247                                             |
|                | BP             | 0.191                                             |
|                | BG             | 0.303                                             |
| Scenario No. 6 | MK             | 0.275                                             |
|                | BB             | 0.212                                             |
|                | NP             | 0.255                                             |
|                | MN             | 0.126                                             |
|                | HP             | 0.269                                             |
|                | MY             | 0.321                                             |
|                | BP             | 0.259                                             |
|                | BG             | 0.720                                             |

**Table S5.** The predicted annual concentration of toluene.

| Scenario No.   | Receptor sites | Annual Concentration ( $\mu\text{g}/\text{m}^3$ ) |
|----------------|----------------|---------------------------------------------------|
| Scenario No. 1 | MK             | 0.412                                             |
|                | BB             | 0.148                                             |
|                | NP             | 0.257                                             |
|                | MN             | 0.182                                             |
|                | HP             | 0.218                                             |
|                | MY             | 0.254                                             |
|                | BP             | 0.220                                             |
|                | BG             | 1.056                                             |
| Scenario No. 2 | MK             | -                                                 |
|                | BB             | -                                                 |
|                | NP             | -                                                 |
|                | MN             | -                                                 |
|                | HP             | -                                                 |
|                | MY             | -                                                 |
|                | BP             | -                                                 |
|                | BG             | -                                                 |
| Scenario No. 3 | MK             | 0.057                                             |
|                | BB             | 0.061                                             |
|                | NP             | 0.068                                             |
|                | MN             | 0.023                                             |
|                | HP             | 0.058                                             |
|                | MY             | 0.092                                             |
|                | BP             | 0.072                                             |
|                | BG             | 0.150                                             |
| Scenario No. 4 | MK             | -                                                 |
|                | BB             | -                                                 |
|                | NP             | -                                                 |
|                | MN             | -                                                 |
|                | HP             | -                                                 |
|                | MY             | -                                                 |
|                | BP             | -                                                 |
|                | BG             | -                                                 |

| Scenario No.   | Receptor sites | Annual Concentration (µg/m³) |
|----------------|----------------|------------------------------|
| Scenario No. 5 | MK             | 0.033                        |
|                | BB             | 0.051                        |
|                | NP             | 0.055                        |
|                | MN             | 0.012                        |
|                | HP             | 0.037                        |
|                | MY             | 0.076                        |
|                | BP             | 0.058                        |
|                | BG             | 0.088                        |
| Scenario No. 6 | MK             | 0.048                        |
|                | BB             | 0.046                        |
|                | NP             | 0.052                        |
|                | MN             | 0.021                        |
|                | HP             | 0.047                        |
|                | MY             | 0.069                        |
|                | BP             | 0.055                        |
|                | BG             | 0.126                        |

**Table S6.** The percentage of emission reduction and annual concentration and its percentage of concentrations reduction of xylenes.

| Scenario No.   | Receptor sites | Annual Concentration ( $\mu\text{g}/\text{m}^3$ ) |
|----------------|----------------|---------------------------------------------------|
| Scenario No. 1 | MK             | 4.729                                             |
|                | BB             | 2.054                                             |
|                | NP             | 2.274                                             |
|                | MN             | 1.673                                             |
|                | HP             | 1.942                                             |
|                | MY             | 3.528                                             |
|                | BP             | 3.094                                             |
|                | BG             | 17.759                                            |
| Scenario No. 2 | MK             | 3.787                                             |
|                | BB             | 1.728                                             |
|                | NP             | 1.872                                             |
|                | MN             | 1.326                                             |
|                | HP             | 1.663                                             |
|                | MY             | 2.928                                             |
|                | BP             | 2.538                                             |
|                | BG             | 14.026                                            |
| Scenario No. 3 | MK             | 0.873                                             |
|                | BB             | 1.131                                             |
|                | NP             | 1.191                                             |
|                | MN             | 0.317                                             |
|                | HP             | 0.943                                             |
|                | MY             | 1.684                                             |
|                | BP             | 1.310                                             |
|                | BG             | 2.274                                             |
| Scenario No. 4 | MK             | -                                                 |
|                | BB             | -                                                 |
|                | NP             | -                                                 |
|                | MN             | -                                                 |
|                | HP             | -                                                 |
|                | MY             | -                                                 |
|                | BP             | -                                                 |



| Scenario No.   | Receptor sites | Annual Concentration (µg/m³) |
|----------------|----------------|------------------------------|
|                | BG             | -                            |
| Scenario No. 5 | MK             | 0.858                        |
|                | BB             | 1.125                        |
|                | NP             | 1.182                        |
|                | MN             | 0.309                        |
|                | HP             | 0.928                        |
|                | MY             | 1.673                        |
|                | BP             | 1.300                        |
|                | BG             | 2.233                        |
| Scenario No. 6 | MK             | 0.485                        |
|                | BB             | 0.482                        |
|                | NP             | 0.529                        |
|                | MN             | 0.200                        |
|                | HP             | 0.496                        |
|                | MY             | 0.721                        |
|                | BP             | 0.571                        |
|                | BG             | 1.268                        |

**Table S7.** VOCs emissions from each unit of wastewater treatment unit.

| Unit code                         | Air emission rate (g/s) |          |          |
|-----------------------------------|-------------------------|----------|----------|
|                                   | Benzene                 | Toluene  | Xylenes  |
| waste drop from pipe to bio eq    | 0.0239                  | 0.00814  | 0.00488  |
| waste drop from pipe to storm DAF | 3.2E-12                 | 6.8E-12  | 7.23E-10 |
| XC12 Bio tranfer                  | 0.00236                 | 0.000635 | 0.0132   |
| ME05 DAF                          | 1.35E-12                | 3.28E-13 | 4.77E-10 |
| aeration tank ME12A               | 0.0112                  | 0.00248  | 0.0326   |
| aeration tank ME12B               | 0.0114                  | 0.00241  | 0.0312   |
| Clearifier ME15A                  | 1.17E-05                | 2.25E-06 | 5.97E-05 |
| Clearifier ME15B                  | 0.000012                | 2.32E-06 | 6.27E-05 |
| ME101A DAF                        | 9.24E-05                | 2.17E-05 | 0.000218 |
| XC20 final basin                  | 2.01E-05                | 3.9E-06  | 0.000172 |
| ME101B DAF                        | 9.39E-05                | 2.23E-05 | 0.000227 |
| XC19 open sump                    | 2.29E-05                | 7.17E-06 | 0.000279 |
| New ETP_TK24                      | 3.66E-18                | 1.46E-18 | 6.78E-17 |
| New ETP_contact tank (XC23)       | 0.0306                  | 0.0122   | 0.3      |
| New ETP_Flocculation tank (XC26)  | 0.000855                | 0.000323 | 0.155    |
| New ETP_Setling zone (XC27)       | 3.3E-07                 | 1.01E-07 | 0.00175  |

## References

1. EPA, U. User's Guide for the AMS/EPA Regulatory Model (AERMOD). 2013. Available online: [https://gaftp.epa.gov/Air/aqmg/SCRAM/models/preferred/aermod/aermod\\_userguide.pdf](https://gaftp.epa.gov/Air/aqmg/SCRAM/models/preferred/aermod/aermod_userguide.pdf) (accessed on 24 December 2022).
2. Kumar, A.; Patil, R. S.; Dikshit, A. K.; Kumar, R. Application of AERMOD for short-term air quality prediction with forecasted meteorology using WRF model. *Clean Technol. Environ. Policy* **2017**, *19* (7), 1955-1965. DOI: 10.1007/s10098-017-1379-0
3. EPA, U. Documentation of the Evaluation of CALPUFF and Other Long Range Transport Models Using Tracer Field Experiment Data. Available online: [https://www.epa.gov/sites/default/files/2020-10/documents/epa-454\\_r-12-003\\_0.pdf](https://www.epa.gov/sites/default/files/2020-10/documents/epa-454_r-12-003_0.pdf) (accessed on 24 December 2022).
4. Joseph, S. S., David G. S., Robert J. Y. A User's Guide for the CALPUFF Dispersion Model (Version 5). 2000. Available online: [https://www.eoas.ubc.ca/courses/atasc507/ADM/calpuff/CALPUFF\\_UsersGuide-v5-excellent.pdf](https://www.eoas.ubc.ca/courses/atasc507/ADM/calpuff/CALPUFF_UsersGuide-v5-excellent.pdf) (accessed on 25 December 2022).
5. Roland D., Barbara S., Glenn R., Ariel S., Albion T., Sonny Z., Chris L., Alice C. HYSPLIT USER's GUIDE. 2022. Available online: [https://www.arl.noaa.gov/documents/reports/hysplit\\_user\\_guide.pdf](https://www.arl.noaa.gov/documents/reports/hysplit_user_guide.pdf) (accessed on 25 December 2022).
6. NOAA. HYSPLIT. Available online: <https://www.arl.noaa.gov/hysplit/> (accessed on 25 December 2022).
7. Ramboll E. H. User's Guide Comprehensive Air Quality Model With Extensions Version 7.10. 2020. Available online: [https://camx-wp.azurewebsites.net/Files/CAMxUsersGuide\\_v7.10.pdf](https://camx-wp.azurewebsites.net/Files/CAMxUsersGuide_v7.10.pdf) (accessed on 25 December 2022).
8. Appel, K. W.; Napelenok, S. L.; Foley, K. M.; Pye, H. O. T.; Hogrefe, C.; Luecken, D. J.; Bash, J. O.; Roselle, S. J.; Pleim, J. E.; Foroutan, H.; Hutzell, W. T.; Pouliot, G. A.; Sarwar, G.; Fahey, K. M.; Gantt, B.; Gilliam, R. C.; Heath, N. K.; Kang, D.; Mathur, R.; Schwede, D. B.; Spero, T. L.; Wong, D. C.; Young, J. O. Description and evaluation of the Community Multiscale Air Quality (CMAQ) modeling system version 5.1. *Geosci. Model Dev.* **2017**, *10* (4), 1703-1732. DOI: 10.5194/gmd-10-1703-2017.
9. EPA, U. Community Multiscale Air Quality Modeling System (CMAQ). Available online: <https://www.epa.gov/cmaq/cmaq-models-0> (accessed on 25 December 2022).
